# Supplementary material
Source: Springer Nature journal article supplement (https://www.springermedizin.de/resource/supplementary/13014_2008_126_MOESM1_ESM.pdf/9632962)

# ED-SCLC

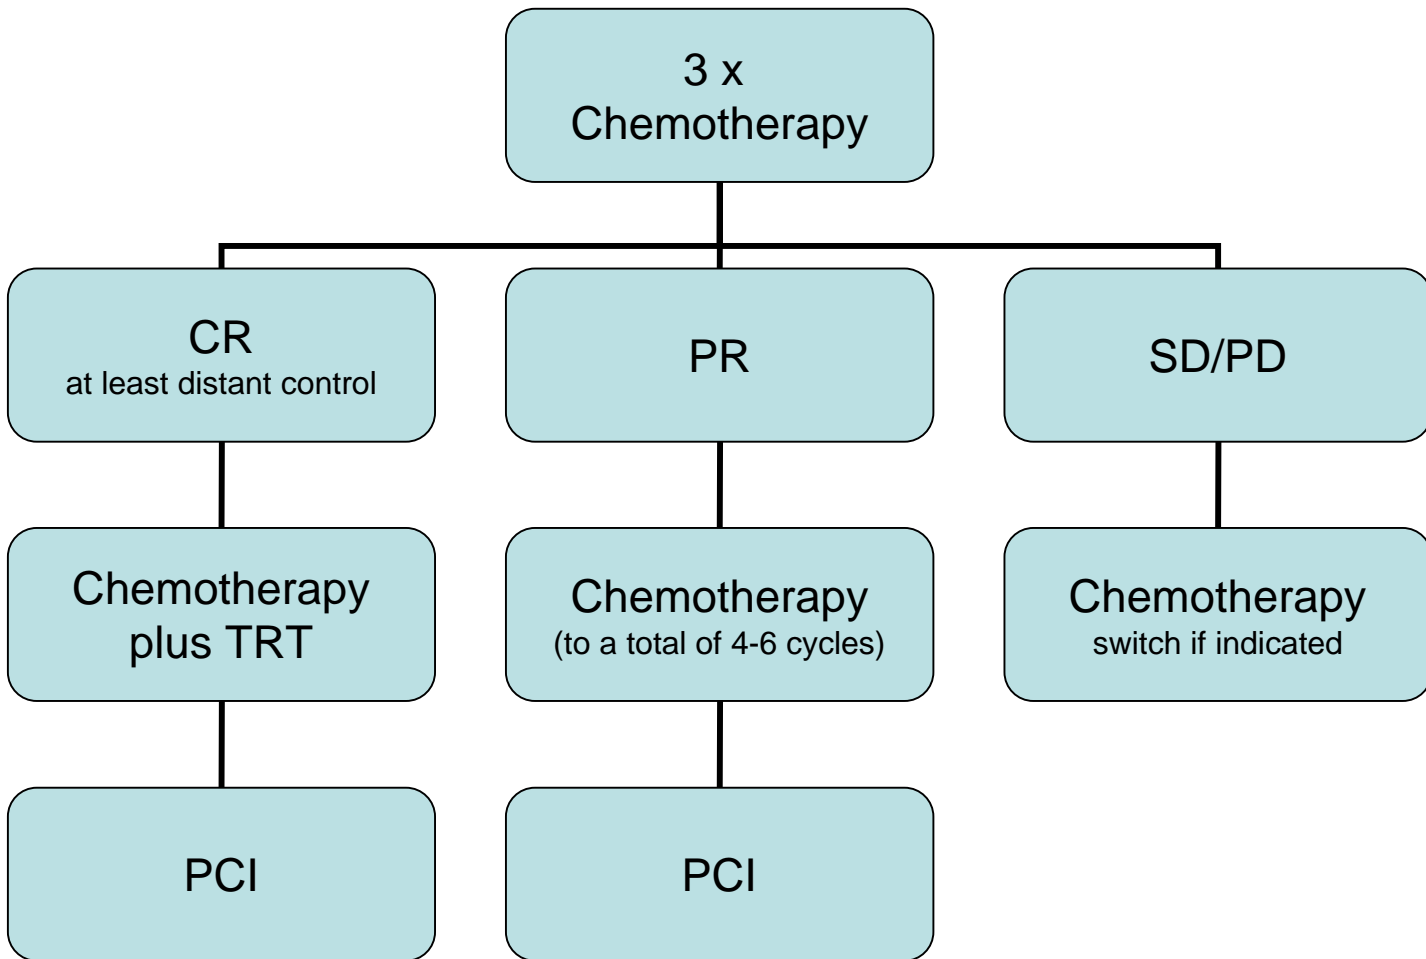

Supplement: MOESM1 [file 9632962]
